# Supplementary material for: Informing the Design of a Neuroscience Experiment by Exploring the Evolution of Indirect to Direct Relations Between Topics in Augmented Reality Using a Timeline
Source: Research Square preprint supplement (doi:10.21203/rs.3.rs-6327352/v1), 2025-06-25
Supplement: Supplementary file 1 [file 3178d6cfaca94680cb3b71c5.pdf]

**Informing the Design of a Neuroscience Experiment by Exploring the Evolution of Indirect to Direct Relations Between Topics in Augmented Reality Using a Timeline**

See also the video: <https://edu.nl/y8q8e>
